# Supplementary material
Source: PubMed Central journal article supplement (PMC7934551)
Supplement: NIHMS1674774-supplement-1.pdf [file NIHMS1674774-supplement-1.pdf]

Supplemental Table 1. Criteria for scoring HEI-2015, AHEI-2010, aMed, and DASH scores<sup>a</sup>.

| Component                                                          | HEI-2015<br>(0-100 points)                 |                                  | AHEI-2010<br>(0-110 points) |                                               | aMed <sup>b</sup><br>(0-9 points) |                    | DASH<br>(8-40 points) |                        |
|--------------------------------------------------------------------|--------------------------------------------|----------------------------------|-----------------------------|-----------------------------------------------|-----------------------------------|--------------------|-----------------------|------------------------|
|                                                                    | Minimum                                    | Maximum                          | Minimum                     | Maximum                                       | Minimum                           | Maximum            | Minimum               | Maximum                |
| Total vegetables                                                   | 0 points<br>0 cups <sup>c</sup> /1000 kcal | 5 points<br>≥1.1 cups/1000 kcal  | 0 points<br>0 servings/day  | 10 points<br>≥5 servings/day                  | 0 points<br><Median               | 1 point<br>≥Median | 1 point<br>Quintile 1 | 5 points<br>Quintile 5 |
| Greens & beans                                                     | 0 points<br>0 cups/1000 kcal               | 5 points<br>≥0.2 cups/1000 kcal  |                             |                                               |                                   |                    |                       |                        |
| Total fruit                                                        | 0 points<br>0 cups/1000 kcal               | 5 points<br>≥0.8 cups/1000 kcal  | 0 points<br>0 servings/day  | 10 points<br>≥4 servings/day                  | 0 points<br><Median               | 1 point<br>≥Median | 1 point<br>Quintile 1 | 5 points<br>Quintile 5 |
| Whole fruit                                                        | 0 points<br>0 cups/1000 kcal               | 5 points<br>≥0.4 cups/1000 kcal  |                             |                                               |                                   |                    |                       |                        |
| Whole grains                                                       | 0 points<br>0 oz <sup>d</sup> /1000 kcal   | 10 points<br>≥1.5 oz/1000 kcal   | 0 points<br>0 g/day         | 10 points<br>75g/day (women)<br>90g/day (men) | 0 points<br><Median               | 1 point<br>≥Median | 1 point<br>Quintile 1 | 5 points<br>Quintile 5 |
| Refined grains                                                     | 0 points<br>≥4.3 oz/1000 kcal              | 10 points<br>≤1.8 oz/1000 kcal   |                             |                                               |                                   |                    |                       |                        |
| All dairy                                                          | 0 points<br>0 cups/1000 kcal               | 10 points<br>≥1.3 cups/1000 kcal |                             |                                               |                                   |                    |                       |                        |
| Low-fat dairy                                                      |                                            |                                  |                             |                                               |                                   |                    | 1 point<br>Quintile 1 | 5 points<br>Quintile 5 |
| Sugar sweetened beverages <sup>e</sup>                             |                                            |                                  | 0 points<br>≥1 servings/day | 10 points<br>0 servings/day                   |                                   |                    | 1 point<br>Quintile 5 | 5 points<br>Quintile 1 |
| Total protein                                                      | 0 points<br>0 oz/1000 kcal                 | 5 points<br>≥2.5 oz/1000 kcal    |                             |                                               |                                   |                    |                       |                        |
| Nuts & legumes<br>(2 different<br>categories for<br>Mediterranean) |                                            |                                  | 0 points<br>0 servings/day  | 10 points<br>≥1 serving/day                   | 0 points<br><Median               | 1 point<br>≥Median | 1 point<br>Quintile 1 | 5 points<br>Quintile 5 |
|                                                                    |                                            |                                  |                             |                                               | 0 points<br><Median               | 1 point<br>≥Median |                       |                        |
| Red/processed meat                                                 |                                            |                                  | 0 points                    | 10 points                                     | 0 points                          | 1 point            | 1 point               | 5 points               |

|                          |                             |                               | ≥1.5 servings/day          | 0 servings/day             | ≥Median             | <Median            | Quintile 5            | Quintile 1             |
|--------------------------|-----------------------------|-------------------------------|----------------------------|----------------------------|---------------------|--------------------|-----------------------|------------------------|
| Seafood or plant protein | 0 points<br>0 oz/1000 kcal  | 5 points<br>≥0.8 oz/1000 kcal |                            |                            |                     |                    |                       |                        |
| Fish                     |                             |                               |                            |                            | 0 points<br><Median | 1 point<br>≥Median |                       |                        |
| Trans fat                |                             |                               | 0 points<br>≥4% energy     | 10 points<br>≤0.5% energy  |                     |                    |                       |                        |
| Long-chain fats          |                             |                               | 0 points<br>0 mg/day       | 10 points<br>250 mg/day    |                     |                    |                       |                        |
| PUFA                     |                             |                               | 0 points<br>≤2% energy     | 10 points<br>≥10% energy   |                     |                    |                       |                        |
| MUFA:SFA                 |                             |                               |                            |                            | 0 points<br><Median | 1 point<br>≥Median |                       |                        |
| (MUFA+PUFA)/SFA          | 0 points<br>≤1.2            | 10 points<br>≥2.5             |                            |                            |                     |                    |                       |                        |
| Saturated fats           | 0 points<br>≥16% energy     | 10 points<br>≤8% energy       |                            |                            |                     |                    |                       |                        |
| Sodium                   | 0 points<br>≥2.0g/1000 kcal | 10 points<br>≤1.1g/1000 kcal  | 0 points<br>Highest decile | 10 points<br>Lowest decile |                     |                    | 1 point<br>Quintile 5 | 5 points<br>Quintile 1 |
| Alcohol <sup>†</sup>     |                             |                               | 0 points                   | 10 points                  | 0 points            | 1 point            |                       |                        |
| Women                    |                             |                               | ≥2.5 drinks/day            | 0.5-1.5<br>drinks/day      | <5 or >15<br>g/day  | 5-15 g/day         |                       |                        |
| Men                      |                             |                               | ≥3.5 drinks/day            | 0.5-2.0<br>drinks/day      | <10 or >25<br>g/day | 10-25<br>g/day     |                       |                        |
| Added sugars             | 0 points<br>≥26% energy     | 10 points<br>≤6.5% energy     |                            |                            |                     |                    |                       |                        |

<sup>a</sup> AHEI-2010, Alternative Healthy Eating Index-2010; aMed, alternate Mediterranean diet score; DASH; Dietary Approaches to Stop

Hypertension; HEI-2015, Healthy Eating Index-2015; kcal, kilocalorie; MUFA, monounsaturated fatty acids; oz, ounce; PUFA, polyunsaturated fatty acids; SFA; saturated fatty acids; SSB, sugar-sweetened beverages.

<sup>b</sup> aMed sex-specific median cutoffs for each component for women and men, respectively: vegetables (1.13 & 1.01 servings/d), fruits (0.94 & 0.76 servings/d), whole grains (1.55 & 1.53 servings/d), nuts (0.25 & 0.29 servings/d), legumes (0.09 & 0.08 servings/d), red/processed meat (1.27 & 1.95 servings/d), fish (0.38 & 0.48 servings/d), MUFA:SFA (1.22 & 1.23), alcohol (5-15 g/d & 10-25 g/d)

<sup>c</sup> 1 cup = 236.6 mL.

<sup>d</sup> 1 ounce = 28.3 g.

<sup>e</sup> For AHEI-2010, sugar-sweetened beverages in addition to fruit juice.

<sup>f</sup> For AHEI-2010, non-drinkers received a score of 2.5.

Supplemental Table 2. Baseline characteristics of ARIC participants by quintile of AHEI-2010 score<sup>1</sup>.

| Characteristic                      | AHEI-2010 Quintile |               |               |               |               | P      |
|-------------------------------------|--------------------|---------------|---------------|---------------|---------------|--------|
|                                     | Q1<br>n=2,726      | Q2<br>n=2,726 | Q3<br>n=2,726 | Q4<br>n=2,726 | Q5<br>n=2,726 |        |
| AHEI-2010 score                     | 36 ± 5             | 45 ± 2        | 51 ± 2        | 58 ± 2        | 69 ± 6        | <0.001 |
| Age, years                          | 54 ± 6             | 54 ± 6        | 54 ± 6        | 54 ± 6        | 55 ± 6        | <0.001 |
| Female, %                           | 50                 | 53            | 55            | 57            | 62            | <0.001 |
| Black, %                            | 30                 | 29            | 26            | 25            | 18            | <0.001 |
| College education, %                | 28                 | 32            | 36            | 39            | 45            | <0.001 |
| Smoking status, %                   |                    |               |               |               |               | <0.001 |
| Never smoker                        | 39                 | 42            | 43            | 43            | 43            |        |
| Former smoker                       | 28                 | 31            | 31            | 35            | 37            |        |
| Current smoker                      | 33                 | 27            | 26            | 23            | 21            |        |
| Alcohol status, %                   |                    |               |               |               |               | <0.001 |
| Never drinker                       | 27                 | 27            | 25            | 24            | 22            |        |
| Former drinker                      | 22                 | 18            | 18            | 17            | 15            |        |
| Current drinker                     | 50                 | 54            | 58            | 59            | 63            |        |
| Physical activity index (1-5)       | 2.3 ± 0.7          | 2.3 ± 0.8     | 2.4 ± 0.8     | 2.5 ± 0.8     | 2.7 ± 0.8     | <0.001 |
| APOE ε4 (1-2 alleles), %            | 31                 | 31            | 30            | 30            | 31            | 0.8    |
| BMI, kg/m <sup>2</sup>              | 28 ± 5             | 28 ± 6        | 28 ± 6        | 28 ± 5        | 27 ± 5        | <0.001 |
| Total cholesterol, mg/dL            | 212 ± 42           | 212 ± 42      | 214 ± 41      | 217 ± 41      | 216 ± 42      | <0.001 |
| Diabetes, %                         | 10                 | 11            | 11            | 12            | 12            | 0.2    |
| Systolic blood pressure, mmHg       | 122 ± 19           | 122 ± 19      | 121 ± 18      | 122 ± 19      | 119 ± 18      | <0.001 |
| Antihypertensive medication, %      | 29                 | 30            | 30            | 31            | 28            | 0.2    |
| Coronary heart disease, %           | 4                  | 4             | 4             | 5             | 5             | 0.01   |
| Average total energy intake, kcal/d | 1,389 ± 493        | 1,430 ± 524   | 1,472 ± 536   | 1,528 ± 528   | 1,623 ± 479   | <0.001 |
| Visit 2 global cognitive z-score    | -0.1 ± 1           | -0.1 ± 1      | 0 ± 1         | 0.1 ± 1       | 0.2 ± 0.9     | <0.001 |

<sup>a</sup> Values for categorical variables are given as percentage; for continuous variables, mean  $\pm$  standard deviation.

<sup>b</sup> Categorical variables were analyzed using chi-square test. Continuous variables were analyzed using analysis of variance (ANOVA) test.

<sup>c</sup> Physical activity index score was calculated based on intensity and time of sport and exercise during leisure time; 1-lowest and 5-highest.

AHEI, Alternative Healthy Eating Index; *APOE*, apolipoprotein E; ARIC, Atherosclerosis Risk in Communities study; BMI, body mass index; CHD, coronary heart disease; mg/dL; milligrams per deciliter; mmHg, millimeters of mercury; Q, quintile.

Supplemental Table 3. Baseline characteristics of ARIC participants by quintile of aMed score<sup>1</sup>.

| Characteristic                      | aMed Quintile |               |               |               |               | P      |
|-------------------------------------|---------------|---------------|---------------|---------------|---------------|--------|
|                                     | Q1<br>n=2,545 | Q2<br>n=2,443 | Q3<br>n=2,780 | Q4<br>n=2,524 | Q5<br>n=3,338 |        |
| aMed score                          | 2 ± 1         | 3 ± 0         | 4 ± 0         | 5 ± 0         | 7 ± 1         | <0.001 |
| Age, years                          | 53 ± 6        | 54 ± 6        | 54 ± 6        | 55 ± 6        | 55 ± 6        | <0.001 |
| Female, %                           | 57            | 57            | 55            | 55            | 55            | 0.3    |
| Black, %                            | 21            | 26            | 27            | 29            | 26            | <0.001 |
| College education, %                | 29            | 31            | 34            | 39            | 45            | <0.001 |
| Smoking status, %                   |               |               |               |               |               | <0.001 |
| Never smoker                        | 38            | 40            | 42            | 44            | 45            |        |
| Former smoker                       | 29            | 30            | 32            | 34            | 36            |        |
| Current smoker                      | 32            | 30            | 26            | 22            | 20            |        |
| Alcohol status, %                   |               |               |               |               |               | 0.004  |
| Never drinker                       | 24            | 26            | 26            | 26            | 24            |        |
| Former drinker                      | 20            | 19            | 18            | 19            | 16            |        |
| Current drinker                     | 56            | 56            | 56            | 56            | 59            |        |
| Physical activity index (1-5)       | 2.3 ± 0.8     | 2.4 ± 0.8     | 2.4 ± 0.8     | 2.5 ± 0.8     | 2.6 ± 0.8     | <0.001 |
| APOE ε4 (1-2 alleles), %            | 30            | 30            | 31            | 30            | 32            | 0.3    |
| BMI, kg/m <sup>2</sup>              | 28 ± 6        | 28 ± 5        | 28 ± 5        | 28 ± 5        | 27 ± 5        | 0.1    |
| Total cholesterol, mg/dL            | 213 ± 42      | 214 ± 41      | 214 ± 42      | 214 ± 42      | 216 ± 41      | 0.03   |
| Diabetes, %                         | 9             | 11            | 12            | 12            | 12            | 0.01   |
| Systolic blood pressure, mmHg       | 120 ± 19      | 122 ± 19      | 121 ± 19      | 122 ± 19      | 120 ± 18      | <0.001 |
| Antihypertensive medication, %      | 25            | 30            | 30            | 32            | 30            | <0.001 |
| Coronary heart disease, %           | 3             | 4             | 4             | 5             | 6             | <0.001 |
| Average total energy intake, kcal/d | 1,303 ± 461   | 1,385 ± 493   | 1,473 ± 508   | 1,564 ± 529   | 1,661 ± 513   | <0.001 |
| Visit 2 global cognitive z-score    | 0.1 ± 1       | 0 ± 1         | 0 ± 1         | 0 ± 1         | 0.1 ± 1       | <0.001 |

<sup>a</sup> Values for categorical variables are given as percentage; for continuous variables, mean  $\pm$  standard deviation.

<sup>b</sup> Categorical variables were analyzed using chi-square test. Continuous variables were analyzed using analysis of variance (ANOVA) test.

<sup>c</sup> Physical activity index score was calculated based on intensity and time of sport and exercise during leisure time; 1-lowest and 5-highest.

aMed, alternate Mediterranean; *APOE*, apolipoprotein E; ARIC, Atherosclerosis Risk in Communities study; BMI, body mass index; CHD, coronary heart disease; mg/dL; milligrams per deciliter; mmHg, millimeters of mercury; Q, quintile.

Supplemental Table 4. Baseline characteristics of ARIC participants by quintile of DASH score<sup>1</sup>.

| Characteristic                      | DASH Quintile |               |               |               |               | P      |
|-------------------------------------|---------------|---------------|---------------|---------------|---------------|--------|
|                                     | Q1<br>n=3,431 | Q2<br>n=2,710 | Q3<br>n=2,037 | Q4<br>n=2,781 | Q5<br>n=2,671 |        |
| DASH score                          | 18 ± 2        | 22 ± 1        | 25 ± 1        | 27 ± 1        | 31 ± 2        | <0.001 |
| Age, years                          | 53 ± 6        | 54 ± 6        | 54 ± 6        | 55 ± 6        | 55 ± 6        | <0.001 |
| Female, %                           | 41            | 50            | 55            | 64            | 71            | <0.001 |
| Black, %                            | 39            | 27            | 23            | 20            | 15            | <0.001 |
| College education, %                | 25            | 34            | 37            | 42            | 47            | <0.001 |
| Smoking status, %                   |               |               |               |               |               | <0.001 |
| Never smoker                        | 33            | 39            | 46            | 46            | 49            |        |
| Former smoker                       | 29            | 32            | 31            | 34            | 36            |        |
| Current smoker                      | 38            | 29            | 23            | 20            | 15            |        |
| Alcohol status, %                   |               |               |               |               |               | <0.001 |
| Never drinker                       | 25            | 24            | 26            | 25            | 25            |        |
| Former drinker                      | 22            | 18            | 16            | 18            | 17            |        |
| Current drinker                     | 54            | 58            | 59            | 57            | 58            |        |
| Physical activity index (1-5)       | 2.2 ± 0.7     | 2.4 ± 0.8     | 2.4 ± 0.8     | 2.5 ± 0.8     | 2.7 ± 0.8     | <0.001 |
| APOE ε4 (1-2 alleles), %            | 32            | 30            | 29            | 30            | 32            | 0.1    |
| BMI, kg/m <sup>2</sup>              | 28 ± 5        | 28 ± 5        | 29 ± 6        | 28 ± 5        | 27 ± 5        | 0.03   |
| Total cholesterol, mg/dL            | 212 ± 42      | 213 ± 41      | 215 ± 42      | 215 ± 40      | 217 ± 44      | 0.001  |
| Diabetes, %                         | 9             | 11            | 14            | 12            | 13            | <0.001 |
| Systolic blood pressure, mmHg       | 123 ± 20      | 121 ± 18      | 122 ± 19      | 120 ± 19      | 119 ± 18      | <0.001 |
| Antihypertensive medication, %      | 28            | 29            | 31            | 31            | 30            | 0.02   |
| Coronary heart disease, %           | 4             | 4             | 4             | 4             | 6             | 0.001  |
| Average total energy intake, kcal/d | 1,603 ± 549   | 1,508 ± 553   | 1,466 ± 527   | 1,428 ± 497   | 1,401 ± 422   | <0.001 |
| Visit 2 global cognitive z-score    | -0.3 ± 1      | 0 ± 1         | 0 ± 1         | 0.2 ± 1       | 0.3 ± 1       | <0.001 |



<sup>a</sup> Values for categorical variables are given as percentage; for continuous variables, mean  $\pm$  standard deviation.

<sup>b</sup> Categorical variables were analyzed using chi-square test. Continuous variables were analyzed using analysis of variance (ANOVA) test.

<sup>c</sup> Physical activity index score was calculated based on intensity and time of sport and exercise during leisure time; 1-lowest and 5-highest.

*APOE*, apolipoprotein E; ARIC, Atherosclerosis Risk in Communities study; BMI, body mass index; CHD, coronary heart disease; DASH, Dietary Approaches to Stop Hypertension; mg/dL; milligrams per deciliter; mmHg, millimeters of mercury; Q, quintile.
